# Supplementary material
Source: HighWire-hosted journal article supplement (http://ajnr-stage2.highwire.org/highwire/filestream/59951/field_highwire_adjunct_files/0/17-01055.pdf)
Supplement: 17-01055.pdf [file 17-01055.pdf]

**On-line Table 1: Search syntax**

| PubMed Search Accessed on August 28, 2017 (1445 Articles)                                                                                                                                     | EMBASE Search Accessed on August 28, 2017 (1049 Articles)                                                          | MEDLINE Search Accessed on August 28, 2017 (199 Articles)                      |
|-----------------------------------------------------------------------------------------------------------------------------------------------------------------------------------------------|--------------------------------------------------------------------------------------------------------------------|--------------------------------------------------------------------------------|
| ((intracranial giant aneurysms OR very large intracranial aneurysms) AND endovascular treatment) AND ("1990/01/01"(Date - Publication): "3000"(Date - Publication))                           | ('giant':ab,ti OR 'very large intracranial aneurysm':ab,ti) AND 'endovascular treatment':ab,ti AND (1990–2017)/py  | ((giant or very large intracranial aneurysms) and endovascular treatment).ab.  |
| ((giant(Title/Abstract) OR very large intracranial aneurysms(Title/Abstract))) AND coiling(Title/Abstract) AND ("1990/01/01"(Date - Publication): "3000"(Date - Publication))                 | ('giant':ab,ti OR 'very large intracranial aneurysm':ab,ti) AND 'coiling':ab,ti AND (1990–2017)/py                 | ((giant or very large intracranial aneurysms) and coiling).ab.                 |
| ((giant(Title/Abstract) OR very large intracranial aneurysms(Title/Abstract))) AND flow diversion(Title/Abstract) AND ("1990/01/01"(Date - Publication): "3000"(Date - Publication))          | ('giant':ab,ti OR 'very large intracranial aneurysm':ab,ti) AND 'flow diversion':ab,ti AND (1990–2017)/py          | ((giant or very large intracranial aneurysms) and flow diversion).ab.          |
| ((giant(Title/Abstract) OR very large intracranial aneurysms(Title/Abstract))) AND parent artery occlusion(Title/Abstract) AND ("1990/01/01"(Date - Publication): "3000"(Date - Publication)) | ('giant':ab,ti OR 'very large intracranial aneurysm':ab,ti) AND 'parent artery occlusion':ab,ti AND (1990–2017)/py | ((giant or very large intracranial aneurysms) and parent artery occlusion).ab. |

On-line Table 2: Summary of studies included in the meta-analysis

| Study Name                             | Design | No. of An Treated | No. of Unrupt/ Rupt | RC Treatment/ DC | Coiling/ SAC vs FD | BTO before DC Treatment (Negative/ Positive) | Complications (RC/DC) | An Occlusion (RC/DC) | Mean Radiologic/ Clinical Follow-Up (mo) | Quality of Studies (NOS) |
|----------------------------------------|--------|-------------------|---------------------|------------------|--------------------|----------------------------------------------|-----------------------|----------------------|------------------------------------------|--------------------------|
|                                        |        |                   |                     |                  |                    |                                              |                       |                      |                                          |                          |
| Adeeb et al, 2017 <sup>1</sup>         | R      | 50                | 50/0                | 50/0             | 0/50               | —                                            | 16/—                  | 30/— <sup>a</sup>    | 13/13                                    | 6                        |
| Peschillo et al, 2017 <sup>10</sup>    | R      | 18                | 18/0                | 18/0             | 0/18               | —                                            | 4/—                   | NA                   | 12/12                                    | 7                        |
| John et al, 2016 <sup>23</sup>         | R      | 12                | 12/0                | 12/0             | 0/12               | —                                            | 0/—                   | 9/— <sup>a</sup>     | 60/29                                    | 6                        |
| Johnson et al, 2015 <sup>24</sup>      | P      | 13                | NA                  | 13/0             | NA                 | —                                            | 6/—                   | NA                   | 6/6                                      | 5                        |
| Zhang et al, 2015 <sup>25</sup>        | R      | 30                | 27/3                | 19/11            | 19/0               | 11 (11/0)                                    | 7/2                   | 7/11                 | 9/28                                     | 7                        |
| Kallmes et al, 2015 <sup>13</sup>      | P      | 62                | 62/0                | 62/0             | 0/62               | —                                            | 15/—                  | NA                   | NA                                       | 6                        |
| Strauss and Maimon, 2016 <sup>16</sup> | ProDB  | 14                | 14/0                | 14/0             | 0/14               | —                                            | 7/—                   | 5/—                  | NA                                       | 5                        |
| Labeyrie et al, 2015 <sup>26</sup>     | R      | 27                | NA                  | 0/27             | —                  | 27 (27/0)                                    | —/7                   | NA                   | 36/36                                    | 5                        |
| Wang et al, 2015 <sup>27</sup>         | R      | 33                | NA                  | 20/13            | NA                 | 13 (13/0)                                    | NA                    | 17/13                | NA                                       | 5                        |
| Dumont et al, 2014 <sup>28</sup>       | R      | 26                | 21/5                | 22/4             | 6/13               | 4 (4/0)                                      | 11/3                  | NA                   | 18/18                                    | 7                        |
| Derrey et al, 2015 <sup>29</sup>       | ProDB  | 48                | 34/14               | 29/19            | NA                 | NA                                           | NA                    | 15/19                | 60/60                                    | 4                        |
| Cinar et al, 2013 <sup>30</sup>        | R      | 17                | 17/0                | 17/0             | 0/17               | —                                            | 4                     | 12/— <sup>a</sup>    | 6/12                                     | 5                        |
| van Oel et al, 2013 <sup>17</sup>      | R      | 10                | 9/1                 | 10/0             | 9/1                | —                                            | 4                     | 7/— <sup>a</sup>     | 12/24                                    | 6                        |
| Hassan et al, 2013 <sup>14</sup>       | R      | 13                | 13/0                | 0/13             | —                  | 13 (13/0)                                    | —/0                   | NA                   | NA                                       | 4                        |
| Yu et al, 2012 <sup>31</sup>           | P      | 11                | NA                  | 13/0             | 0/11               | —                                            | NA                    | NA                   | 18/18                                    | 4                        |
| Saatci et al, 2012 <sup>15</sup>       | R      | 30                | NA                  | 30/0             | 0/30               | —                                            | NA                    | 27/—                 | 12/NA                                    | 5                        |
| Gao et al, 2012 <sup>3</sup>           | R      | 31                | NA                  | 31/0             | 31/0               | —                                            | 9/—                   | 18/—                 | 38/38                                    | 5                        |
| Limaye et al, 2012 <sup>32</sup>       | R      | 22                | 19/3                | 4/18             | 2/2                | 18 (18/0)                                    | 2/7                   | NA                   | 12/60                                    | 6                        |
| Matouk et al, 2012 <sup>33</sup>       | ProDB  | 19                | 19/0                | 0/19             | —                  | 19 (19/0)                                    | 10/—                  | 13/—                 | 142/142                                  | 6                        |
| Clarençon et al, 2011 <sup>4</sup>     | R      | 19                | 19/0                | 0/19             | —                  | 19 (19/0)                                    | 1/—                   | 14/— <sup>a</sup>    | 52/52                                    | 7                        |
| Hauck et al, 2009 <sup>34</sup>        | R      | 15                | 15/0                | 15/0             | 15/0               | —                                            | 3/—                   | 7/—                  | 27/27                                    | 6                        |
| Lv et al, 2009 <sup>35</sup>           | R      | 33                | 24/9                | 4/29             | 4/0                | 29 (29/0)                                    | 1/1                   | 1/28                 | 14/14                                    | 7                        |
| Suzuki et al, 2009 <sup>36</sup>       | R      | 12                | 12/0                | 8/4              | 8/0                | NA                                           | 2/1                   | 8/4                  | NA                                       | 5                        |
| Jahromi et al, 2008 <sup>5</sup>       | ProDB  | 38                | 28/10               | 30/8             | 21/0               | 8 (8/0)                                      | 18/3                  | 22/8                 | 24/25                                    | 8                        |
| Standhardt et al, 2008 <sup>37</sup>   | R      | 19                | NA                  | 19/0             | 19/0               | —                                            | NA                    | 13                   | 36/NA                                    | 5                        |
| Li et al, 2007 <sup>38</sup>           | R      | 20                | 19/1                | 11/9             | 10/0               | 9 (9/0)                                      | 4/0                   | 7/9                  | 41/40                                    | 7                        |
| Suzuki et al, 2007 <sup>39</sup>       | R      | 12                | 12                  | 8/4              | 8/0                | 4 (4/0)                                      | 2/1                   | 8/4                  | NA                                       | 6                        |
| Deshaies et al, 2007 <sup>40</sup>     | ProDB  | 10                | NA                  | 10/0             | 10/0               | —                                            | 4                     | 5 <sup>a</sup>       | NA                                       | 5                        |
| Heran et al, 2007 <sup>41</sup>        | ProDB  | 10                | 10/0                | 10/0             | 10/0               | —                                            | 5/—                   | 7/—                  | 30/30                                    | 6                        |
| Cekirge et al, 2006 <sup>42</sup>      | R      | 21                | NA                  | 21/0             | 21/0               | —                                            | 4/— <sup>b</sup>      | 13/—                 | NA                                       | 5                        |
| Lubicz et al, 2004 <sup>21</sup>       | R      | 13                | 9/4                 | 0/13             | —                  | 6 (6/0) <sup>c</sup>                         | —/5                   | —/9 <sup>a</sup>     | 27/27                                    | 7                        |
| Murayama et al, 2003 <sup>43</sup>     | R      | 73                | NA                  | 73/0             | 73/0               | —                                            | NA                    | 66/—                 | 12/NA                                    | 4                        |
| Sluzewski et al, 2003 <sup>44</sup>    | R      | 29                | 9/20                | 29/0             | 29/0               | —                                            | 8/—                   | 14/— <sup>c</sup>    | 6/50                                     | 7                        |
| Ross et al, 2000 <sup>45</sup>         | R      | 19                | NA                  | 10/9             | 10/0               | 9 (9/0)                                      | NA/2                  | 1/9                  | 26/26                                    | 5                        |
| Kim and Choi, 2000 <sup>46</sup>       | R      | 10                | NA                  | 10/0             | 10/0               | —                                            | NA                    | 5/—                  | NA                                       | 4                        |
| Tateshima et al, 2000 <sup>47</sup>    | R      | 10                | NA                  | 10/0             | 10/0               | —                                            | NA                    | 6/—                  | NA                                       | 4                        |
| Morishima et al, 1998 <sup>48</sup>    | R      | 16                | 16/0                | 10/6             | 10/0               | 6 (6/0) <sup>d</sup>                         | 2/0                   | 9/6                  | 17/17                                    | 6                        |
| Viñuela et al, 1997 <sup>49</sup>      | R      | 19                | NA                  | 19/0             | 19/0               | —                                            | NA                    | 9/—                  | NA                                       | 4                        |
| Guglielmi et al, 1992 <sup>50</sup>    | R      | 10                | 7/3                 | 10/0             | 10/0               | —                                            | 1/—                   | 4/— <sup>a</sup>     | 6/6                                      | 6                        |

**Note:**—An indicates aneurysm(s); Unrupt, unruptured, Rupt, ruptured; Pro DB, prospectively maintained database; R, retrospective; RC, reconstructive; DC, deconstructive; FD, flow diversion; BTO, balloon test occlusion; NOS, Newcastle-Ottawa Scale; P, prospective study; NA, not available.

<sup>a</sup> Adeeb et al, 2017: 39 patients available; John et al, 2016: 10 patients available; Cinar et al, 2013: 14 patients available; van Oel et al, 2013: 8 patients available; Clarençon et al, 2011: 15 patients available; Deshaies et al, 2007: 9 patients available; Lubicz et al, 2004: 12 patients available; Guglielmi et al, 1992: 6 patients available.

<sup>b</sup> Cekirge et al, 2006: reported only the rate of permanent complications.

<sup>c</sup> Lubicz et al, 2004: 7 patients with giant aneurysms on the nondominant vertebral artery underwent only 4-vessel angiography and the Allcock test; Sluzewski et al, 2003: 28 patients available.

<sup>d</sup> Morishima et al, 1998: in 2 patients, a protective bypass was performed.

**On-line Table 3: Patient population and characteristics of very large/giant intracranial aneurysms**

| Variables                                            | Raw Numbers (%)                                  | No. of Articles | 95% CI    |
|------------------------------------------------------|--------------------------------------------------|-----------------|-----------|
| Population characteristics                           |                                                  |                 |           |
| No. of patients                                      | 894                                              | 39              |           |
| Mean age (yr)                                        | 53.3 (27–70)                                     | 20              |           |
| M/F                                                  | 142:750 = 0.17                                   | 21              |           |
| Aneurysm characteristics and presenting symptoms     |                                                  |                 |           |
| Aneurysm morphology                                  |                                                  |                 |           |
| Saccular                                             | 108/191 = 56.5%                                  | 8               | 49–63     |
| Fusiform                                             | 83/191 = 43.5%                                   |                 | 36–50     |
| No. of very large/giant thrombotic aneurysms         | 43/112 = 38%                                     | 5               | 30–47.6   |
| No. of unruptured vs ruptured                        | 479/543 = 88%                                    | 19              | 85–90     |
|                                                      | vs                                               |                 |           |
|                                                      | 64/543 = 12%                                     |                 | 12–38     |
| Aneurysm location                                    |                                                  |                 |           |
| Anterior circulation                                 | 314/455 (69%)                                    | 22              | 64.2–73.2 |
| Posterior circulation                                | 141/455 (31%)                                    |                 | 26.7–35.7 |
| Mean aneurysm size                                   | 30 mm (median, 29 mm)                            | 15              |           |
| Aneurysm presenting symptoms                         |                                                  |                 |           |
| Mass effect                                          | 209/350 = 59.5%                                  | 16              | 54.5–64.7 |
| Headache                                             | 36/350 = 10%                                     |                 | 7.5–13    |
| SAH                                                  | 57/350 = 16%                                     |                 | 12.7–20.5 |
| Ischemic                                             | 19/350 = 5.5%                                    |                 | 3.4–8.3   |
| Incidental                                           | 29/350 = 8.5%                                    |                 | 5.8–11.5  |
| Treatment of very large/giant intracranial aneurysms |                                                  |                 |           |
| No. of reconstructive treatments                     | 673/894 = 75%                                    | 34              | 72–78     |
| No. of deconstructive treatments                     | 221/894 = 25%                                    | 16              | 22–27     |
| Unruptured aneurysms                                 |                                                  |                 |           |
| Overall reconstructive treatments                    | 336/479 = 70%                                    | 19              | 65–74     |
| Coiling/SAC                                          | 147/336 = 44%                                    |                 | 38–49     |
| Flow diversion                                       | 189/336 = 56%                                    |                 | 50–61     |
| Overall deconstructive treatments                    | 147/479 = 30%                                    | 8               | 26–34     |
| Ruptured aneurysms                                   |                                                  |                 |           |
| Overall reconstructive treatments with coiling/SAC   | 48/64 = 75%                                      | 8               | 63.6–84   |
| Overall deconstructive treatments                    | 16/64 = 25%                                      | 6               | 15.6–36   |
| Radiologic follow-up (mo)                            | Mean, 26 (range, 6–66)<br>Median, 21; IQR, 12–38 | 27              |           |
| Clinical follow-up (mo)                              | Mean, 34 (range, 6–20)<br>Median, 28; IQR, 17–41 | 24              |           |

**Note:**—VB indicates vertebrobasilar system.

**On-line Table 4: Treatment-related complications and clinical outcome after reconstructive and deconstructive treatments**

| Variables                                                        | Unruptured Group<br>(Results of<br>Meta-Analysis) | No. of<br>Articles | P<br>Value       | Ruptured Group<br>(Results of<br>Meta-Analysis) | No. of<br>Articles | P<br>Value |
|------------------------------------------------------------------|---------------------------------------------------|--------------------|------------------|-------------------------------------------------|--------------------|------------|
| Treatment-related complications                                  |                                                   |                    |                  |                                                 |                    |            |
| Complication rate (reconstructive)                               | 87/267 = 30%<br>(22–37) ( $I^2$ = 60%)            | 19                 |                  | 13/38 = 34%<br>(17–50) ( $I^2$ = 32%)           | 7                  |            |
| vs                                                               |                                                   |                    | .05 <sup>a</sup> |                                                 |                    | .4         |
| Complication rate (deconstructive)                               | 23/112 = 16%<br>(7–25) ( $I^2$ = 58%)             | 11                 |                  | 8/21 = 38%<br>(17–74) ( $I^2$ = 65%)            | 6                  |            |
| Permanent complication (reconstructive)                          | 63/317 = 15%<br>(9–21) ( $I^2$ = 66%)             | 19                 |                  | 9/47 = 20%<br>(7.1–34) ( $I^2$ = 34%)           | 8                  |            |
| vs                                                               |                                                   |                    | .01 <sup>a</sup> |                                                 |                    | .9         |
| Permanent complication (deconstructive)                          | 14/110 = 8.6%<br>(3–14) ( $I^2$ = 19%)            | 10                 |                  | 6/21 = 29%<br>(10–71) ( $I^2$ = 74%)            | 6                  |            |
| Mortality rate (reconstructive)                                  | 28/222 = 9%<br>(5–13) ( $I^2$ = 29%)              | 16                 |                  | 7/38 = 18%<br>(6–34) ( $I^2$ = 22%)             | 7                  |            |
| vs                                                               |                                                   |                    | .35              |                                                 |                    | .9         |
| Mortality rate (deconstructive)                                  | 11/153 = 6%<br>(1–9) ( $I^2$ = 0%)                | 9                  |                  | 4/21 = 19%<br>(3.6–53) ( $I^2$ = 61%)           | 6                  |            |
| Type of complications                                            |                                                   |                    |                  |                                                 |                    |            |
| Ischemic events (reconstructive)                                 | 54/299 = 15%<br>(10–21) ( $I^2$ = 42%)            | 18                 |                  | 6/37 = 18.8%<br>(6.9–30) ( $I^2$ = 0%)          | 6                  |            |
| vs                                                               |                                                   |                    | .4               |                                                 |                    | .3         |
| Ischemic events (deconstructive)                                 | 14/94 = 11%<br>(3–19) ( $I^2$ = 46%)              | 9                  |                  | 5/15 = 33%<br>(14–58) ( $I^2$ = 84%)            | 4                  |            |
| Worsening of mass effect (reconstructive)                        | 5/278 = 1.7%<br>(0.3–3) ( $I^2$ = 0%)             | 17                 | .2               | 1/37 = 6.9%<br>(0.5–16) ( $I^2$ = 24%)          | 6                  |            |
| vs                                                               |                                                   |                    |                  |                                                 |                    | .2         |
| Worsening of mass effect (deconstructive)                        | 3/94 = 3.5%<br>(0.1–7.4) ( $I^2$ = 0%)            | 9                  |                  | 2/19 = 14%<br>(0.5–29) ( $I^2$ = 0%)            | 5                  |            |
| Hemorrhagic events (reconstructive)                              | 23/299 = 6%<br>(3–9) ( $I^2$ = 0%)                | 18                 | .03 <sup>a</sup> | 5/37 = 17%<br>(1.8–33) ( $I^2$ = 37%)           | 6                  |            |
| vs                                                               |                                                   |                    |                  |                                                 |                    | .5         |
| Hemorrhagic events (deconstructive)                              | 1/94 = 2%<br>(0.2–7) ( $I^2$ = 0%)                | 9                  |                  | 1/19 = 9%<br>(0.2–20) ( $I^2$ = 0%)             | 5                  |            |
| Clinical outcomes                                                |                                                   |                    |                  |                                                 |                    |            |
| Overall rate of good outcome (reconstructive)                    | 154/202 = 80%<br>(73–86) ( $I^2$ = 36%)           | 14                 |                  | 20/38 = 60%<br>(41–75) ( $I^2$ = 22%)           | 7                  |            |
| vs                                                               |                                                   |                    | .1               |                                                 |                    | .1         |
| Overall rate of good outcome (deconstructive)                    | 74/87 = 89%<br>(81–96) ( $I^2$ = 42%)             | 8                  |                  | 16/21 = 64%<br>(36–92) ( $I^2$ = 69%)           | 6                  |            |
| Improvement of mass effect/compressive symptoms (reconstructive) | 65/154 = 48%<br>(33–61) ( $I^2$ = 70%)            | 10                 |                  | 3/13 = 24%<br>(21–47) ( $I^2$ = 0%)             | 3                  |            |
| vs                                                               |                                                   |                    | .02 <sup>a</sup> |                                                 |                    |            |
| Improvement of mass effect/compressive symptoms (deconstructive) | 35/45 = 77%<br>(59–94) ( $I^2$ = 68%)             | 6                  |                  | NA                                              |                    |            |

**Note:**—NA indicates not applicable.

<sup>a</sup> Significant.

**On-line Table 5: Aneurysm occlusion and complication rates after reconstructive and deconstructive treatments—influence of patient and aneurysm characteristics**

| Variables                       | Proportion of Complete/<br>Near-Complete Aneurysm<br>Occlusions | No. of<br>Articles | P Value<br>and/or OR | Rate of<br>Complications         | No. of<br>Articles | P Value<br>and/or OR |
|---------------------------------|-----------------------------------------------------------------|--------------------|----------------------|----------------------------------|--------------------|----------------------|
| Reconstructive group            |                                                                 |                    |                      |                                  |                    |                      |
| Younger than 60 yr              | 82%<br>(72–91) ( $I^2 = 51\%$ )                                 | 12                 |                      | 27%<br>(16–40) ( $I^2 = 62\%$ )  | 11                 | .2                   |
| vs                              |                                                                 |                    | .09                  |                                  |                    |                      |
| Older than 60 yr                | 71%<br>(60–84) ( $I^2 = 36\%$ )                                 | 12                 | OR = 1.97            | 38%<br>(25–55) ( $I^2 = 50\%$ )  | 11                 |                      |
| Diameter between 2 and 3 cm     | 77.8%<br>(66–88) ( $I^2 = 59\%$ )                               | 11                 | .36                  | 35%<br>(16–60) ( $I^2 = 86\%$ )  | 8                  |                      |
| vs                              |                                                                 |                    |                      |                                  |                    | .9                   |
| Diameter >3 cm                  | 69.2%<br>(54–83) ( $I^2 = 53\%$ )                               | 11                 |                      | 36%<br>(19–55) ( $I^2 = 44\%$ )  | 8                  |                      |
| Anterior circulation aneurysms  | 78.4%<br>(67–89) ( $I^2 = 72\%$ )                               | 11                 | .2                   | 32%<br>(26–42) ( $I^2 = 0\%$ )   | 10                 |                      |
| vs                              |                                                                 |                    |                      |                                  |                    | .5                   |
| Posterior circulation aneurysms | 66.3%<br>(51–81) ( $I^2 = 31\%$ )                               | 7                  |                      | 33%<br>(22–56) ( $I^2 = 61\%$ )  | 8                  |                      |
| Saccular aneurysms              | 67%<br>(42–90) ( $I^2 = 77\%$ )                                 | 5                  |                      | 23%<br>(2–40) ( $I^2 = 74\%$ )   | 4                  |                      |
| vs                              |                                                                 |                    | .9                   |                                  |                    |                      |
| Fusiform aneurysms              | 64%<br>(12–85) ( $I^2 = 65\%$ )                                 | 2                  |                      | NA                               | NA                 | —                    |
| Deconstructive group            |                                                                 |                    |                      |                                  |                    |                      |
| Younger than 60 yr              | 95.9%<br>(92–99) ( $I^2 = 0\%$ )                                | 8                  |                      | 35%<br>(17–52) ( $I^2 = 39\%$ )  | 9                  |                      |
| vs                              |                                                                 |                    | .007 <sup>a</sup>    |                                  |                    | .3                   |
| Older than 60 yr                | 78%<br>(64–91) ( $I^2 = 0\%$ )                                  | 8                  | OR = 2.5             | 24%<br>(11–37) ( $I^2 = 70\%$ )  | 10                 |                      |
| Diameter between 2 and 3 cm     | 85%<br>(78–95) ( $I^2 = 0\%$ )                                  | 7                  |                      | 33%<br>(13–73) ( $I^2 = 83\%$ )  | 7                  |                      |
| vs                              |                                                                 |                    | .46                  |                                  |                    | .4                   |
| Diameter >3 cm                  | 90%<br>(81–98) ( $I^2 = 0\%$ )                                  | 7                  |                      | 27%<br>(45–50) ( $I^2 = 82\%$ )  | 7                  |                      |
| Anterior circulation aneurysms  | 94.9%<br>(90–99) ( $I^2 = 0\%$ )                                | 8                  |                      | 15%<br>(4.4–26) ( $I^2 = 61\%$ ) | 9                  |                      |
| vs                              |                                                                 |                    | .11                  |                                  |                    | .001 <sup>a</sup>    |
| Posterior circulation aneurysms | 85.9%<br>(73–98) ( $I^2 = 36\%$ )                               | 5                  |                      | 36%<br>(19–52) ( $I^2 = 54\%$ )  | 9                  | OR = 3.6             |
| Saccular aneurysms              | 89%<br>(77–98) ( $I^2 = 0\%$ )                                  | 3                  |                      | 0/17                             | 2                  |                      |
| vs                              |                                                                 |                    |                      |                                  |                    | .7                   |
| Fusiform aneurysms              | 88%<br>(79–98) ( $I^2 = 0\%$ )                                  | 3                  |                      | 10%<br>(1–18) ( $I^2 = 0\%$ )    | 2                  |                      |

**Note:**—NA indicates not applicable.

<sup>a</sup> Significant.

**On-line Table 6: Outcome comparison among coiling/BAC, stent-assisted coiling, and flow diversion for the unruptured very large and giant intracranial aneurysms**

| Variables (Unruptured Group)                                              | Coiling<br>(10 Studies)<br>(Results of<br>Meta-Analysis) | Stent-Assisted<br>Coiling<br>(7 Studies)<br>(Results of<br>Meta-Analysis) | Flow Diversion<br>(10 Studies)<br>(Results of<br>Meta-Analysis) |
|---------------------------------------------------------------------------|----------------------------------------------------------|---------------------------------------------------------------------------|-----------------------------------------------------------------|
| Treatment-related complications                                           |                                                          |                                                                           |                                                                 |
| Proportion of unruptured aneurysms treated with coiling or flow diversion | 131/327 = 40%<br>(34–45)                                 | 57/327 = 16%<br>(13–21)                                                   | 139/327 = 42%<br>(37–47)                                        |
| Overall rate of treatment-related complications                           | 16/71 = 20%<br>(11–28) ( $I^2 = 0\%$ )                   | 29/57 = 39%<br>(24–50) ( $I^2 = 31\%$ )                                   | 39/139 = 29%<br>(14–43) ( $I^2 = 75\%$ )                        |
|                                                                           |                                                          |                                                                           | FD alone      FD + coiling                                      |
|                                                                           |                                                          |                                                                           | 13/44 = 32%      7/28 = 26%                                     |
|                                                                           |                                                          |                                                                           | (8–50) ( $I^2 = 70\%$ )      (4–48) ( $I^2 = 54\%$ )            |
| Complications among anterior circulation                                  | 2/22 = 15%<br>(5–29) ( $I^2 = 0\%$ )                     | 16/40 = 38%<br>(20–55) ( $I^2 = 35\%$ )                                   | 28/143 = 17%<br>(9–24) ( $I^2 = 26\%$ )                         |
| Complications among posterior circulation                                 | 2/10 = 20%<br>(6–40) ( $I^2 = 0\%$ )                     | 9/20 = 43%<br>(15–70) ( $I^2 = 60\%$ )                                    | 16/43 = 41%<br>(15–67) ( $I^2 = 82\%$ )                         |
| Type of complications                                                     |                                                          |                                                                           |                                                                 |
| Ischemic                                                                  | 8/71 = 10%<br>(3–15) ( $I^2 = 0\%$ )                     | 16/49 = 32%<br>(19–44) ( $I^2 = 0\%$ )                                    | 25/139 = 17%<br>(7.6–26) ( $I^2 = 55\%$ )                       |
| Mass effect symptoms                                                      | 4/71 = 6%<br>(1.5–12) ( $I^2 = 0\%$ )                    | 1/49 = 5.4%<br>(0.6–11) ( $I^2 = 0\%$ )                                   | 4/139 = 1.6%<br>(0.5–3.5) ( $I^2 = 0\%$ )                       |
| Hemorrhagic                                                               | 4/71 = 5%<br>(2–14) ( $I^2 = 0\%$ )                      | 5/49 = 10%<br>(0.5–18) ( $I^2 = 32\%$ )                                   | 10/139 = 7%<br>(1.7–8) ( $I^2 = 0\%$ )                          |
| Angiographic outcomes                                                     |                                                          |                                                                           |                                                                 |
| Overall rate of complete/near-complete aneurysm occlusion                 | 40/67 = 59%<br>(41–78) ( $I^2 = 73\%$ )                  | 34/48 = 73%<br>(60–84) ( $I^2 = 0\%$ )                                    | 27/39 = 72%<br>(45–95) ( $I^2 = 77\%$ )                         |
|                                                                           |                                                          |                                                                           | FD alone      FD + coiling                                      |
|                                                                           |                                                          |                                                                           | 18/25 = 75%      10/14 = 70%                                    |
|                                                                           |                                                          |                                                                           | (65–85) ( $I^2 = 0\%$ )      (55–80) ( $I^2 = 0\%$ )            |
| Early aneurysm rupture after treatment                                    | 2/59 = 6%<br>(0.8–11) ( $I^2 = 0\%$ )                    | 4/48 = 9%<br>(0.5–18) ( $I^2 = 40\%$ )                                    | FD alone      FD + coiling                                      |
|                                                                           |                                                          |                                                                           | 3/44 = 7%      0/39                                             |
|                                                                           |                                                          |                                                                           | (0.5–14) ( $I^2 = 0\%$ )                                        |
| Late aneurysm rupture after treatment                                     | 3/60 = 7%<br>(0.9–12) ( $I^2 = 0\%$ )                    | 0/41                                                                      | FD alone      FD + coiling                                      |
|                                                                           |                                                          |                                                                           | 0/44      0/39                                                  |
| Good neurologic outcome                                                   | 37/52 = 72%<br>(40–85) ( $I^2 = 90\%$ )                  | 40/57 = 72%<br>(55–90) ( $I^2 = 59\%$ )                                   | 29/48 = 60%<br>(26–90) ( $I^2 = 84\%$ )                         |

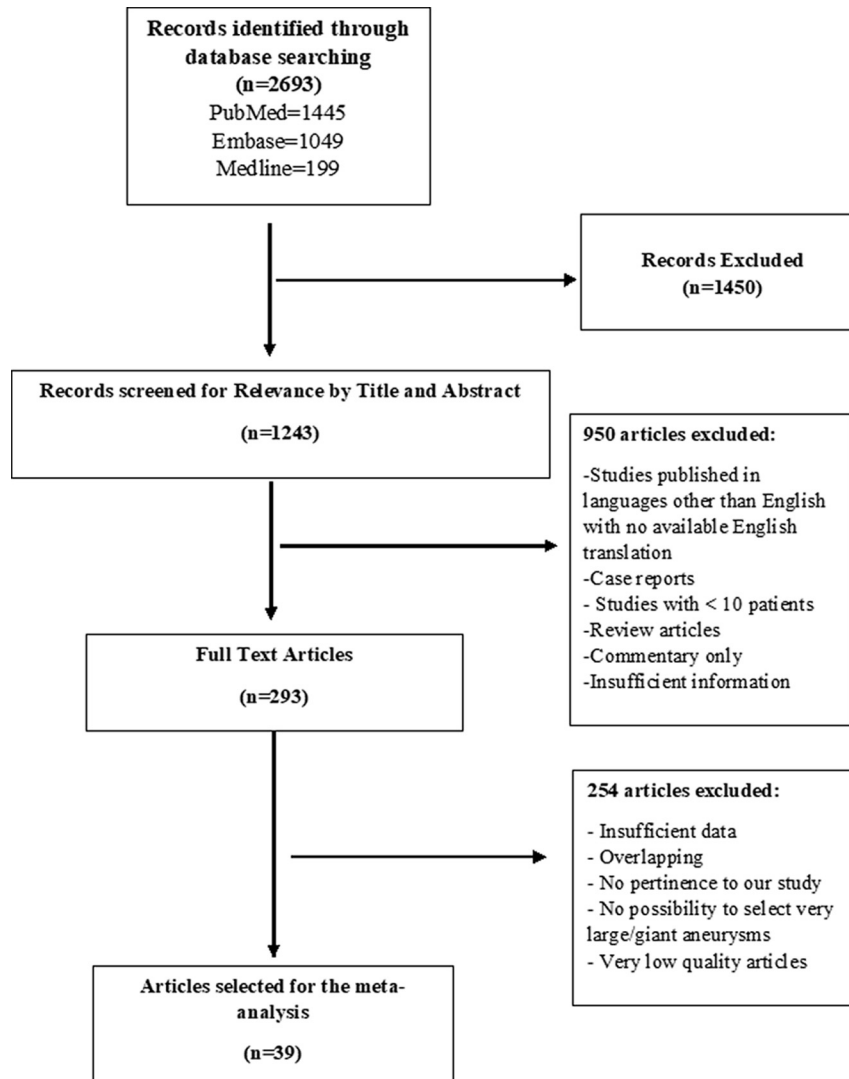

**ON-LINE FIGURE.** PRISMA diagram detailing the specifics of the systematic literature review.
